# Supplementary material
Source: ML conference proceedings conference paper supplement (https://openreview.net/forum?id=yqIJoALgdD)
Supplement: supplementary_material [file attachment]

---

## A APPENDIX

### A.1 GRADIENT DERIVATION PROCESS

This section describes the derivation of Eq. (11) and Eq. (12):

Since we split the input value  $\mathcal{X}$  into two parts, we need to calculate the gradient of the output value for these two parts separately:

For  $\mathcal{X}_1$ :

$$\frac{\partial \mathcal{Y}}{\partial \mathcal{X}_1} = \frac{\partial \mathcal{Y}_1}{\partial \mathcal{X}_1} + \frac{\partial \mathcal{Y}_2}{\partial \mathcal{X}_1}$$

Based on Eq. (2) and Eq. (5):

$$\frac{\partial \mathcal{Y}}{\partial \mathcal{X}_1} = \frac{\partial (\mathcal{H}(\mathcal{M}_1 - V_{th}) + \beta \cdot \mathcal{X}_2^t)}{\partial \mathcal{M}_1} \odot \frac{\partial \mathcal{M}_1^t}{\partial \mathcal{X}_1} + \frac{\partial (\mathcal{H}(\mathcal{M}_2 - V_{th}) + \beta \cdot \mathcal{X}_1^t)}{\partial \mathcal{M}_2} \odot \frac{\partial \mathcal{M}_2}{\partial \mathcal{X}_1}$$

Based on Eq. (1), Eq. (2) and Eq. (4):

$$\frac{\partial \mathcal{Y}}{\partial \mathcal{X}_1} = \frac{\partial \mathcal{H}(\mathcal{M}_1 - V_{th})}{\partial \mathcal{M}_1} \odot \frac{1}{\tau} + \frac{\partial \mathcal{H}(\mathcal{M}_2 - V_{th})}{\partial \mathcal{M}_2} \odot \frac{1}{\tau} \odot \frac{\partial \mathcal{H}(\mathcal{M}_1 - V_{th})}{\partial \mathcal{M}_1} \odot \frac{1}{\tau} + \beta$$

The derivative function of the leapfrog equation is defined in pytorch as follows:

$$\frac{\partial \mathcal{H}(\mathcal{M})}{\partial \mathcal{M}} = \frac{\theta}{2} \cdot \frac{1}{1 + \left(\frac{\pi}{2} \cdot \theta \cdot \mathcal{M}\right)^2}$$

Then, we can get Eq. (11), and for Eq. (12), the derivation method is the same.

### A.2 FLOPS ANALYSIS

For each layer  $n$ , consider the Input tensor  $\mathcal{X}^n$  contains  $k_n$  elements, for the forward process, Eq. (1) contains three calculation steps, Eq. (2) contains three calculation steps, Eq. (3) contains six calculation steps. Eq. (4), Eq. (6), Eq. (5) are perfectly symmetrical with the first three steps. Due to we first divided the matrix into segments, so the total FLOPS for the Forward process of each layer is  $12 \times k_n$ .

For the inverse process, gradient calculation based on the forward computation graph and gradient calculation based on the inverse computation graph, the FLOPS calculation is similar to the forward process. They need  $17 \times k_n$ ,  $15.5 \times k_n$ , and  $8.5 \times k_n$  FLOPS separately.

If the intermediate activation values are retained (shown in Fig. 4(a)), the FLOPS required for the backpropagation process is  $15.5 \times k_n$  for each layer. For the previous reversible layer architecture (shown in Fig. 4(b)), the FLOPS required for the backpropagation process is  $44.5 \times k_n$  for each layer. For our reversible layer architecture (shown in Fig. 4(c)), the FLOPS required for the backpropagation process is  $25.5 \times k_n$  for each layer. This analysis also coincides with our experimental results.

### A.3 COMPARISON WITH THE SOTA METHODS EXPERIMENTS SETTINGS

This section presents the detailed experiment settings for the Section 5.1. The detailed hyperparameter settings are shown in Table 1.

### A.4 MEMORY EVALUATION EXPERIMENT DATA

This section presents the detailed experimental data from Section 5.2. Original memory data comparing reversible SNN nodes and original SNN nodes for VGG configurations is shown in Table 2 and Table 3. And original memory data comparing reversible SNN nodes and original SNN nodes for ResNet configurations is shown in Table 4.

Table 1: The hyperparameter settings for the comparison experiment with the SOTA Methods

| Comparison with the SOTA Methods |          |          |               |
|----------------------------------|----------|----------|---------------|
| dataset                          | CIFAR10  | CIFAR100 | Tiny-ImageNet |
| batch size                       | 128      | 128      | 128           |
| learning rate                    | 0.01     | 0.01     | 0.3           |
| epochs                           | 400      | 400      | 100           |
| optimizer                        | SGD      | SGD      | SGD           |
| momentum                         | 0.9      | 0.9      | 0.9           |
| weight_decay                     | 1.00E-05 | 1.00E-05 | 5.00E-04      |

Table 2: Original memory data comparing reversible SNN nodes and original SNN nodes for VGG configurations from timestep 1 to 10.

| VGG architectures timesteps 1-10 |       |       |       |         |         |         |         |         |          |        |
|----------------------------------|-------|-------|-------|---------|---------|---------|---------|---------|----------|--------|
| VGG11                            |       |       |       |         |         |         |         |         |          |        |
| Timesteps                        | 1     | 2     | 3     | 4       | 5       | 6       | 7       | 8       | 9        | 10     |
| Origina SNN node memory(MiB)     | 298   | 522.5 | 743.5 | 966.5   | 1187.25 | 1410.5  | 1630.25 | 1852.25 | 2075.25  | 2298.5 |
| Reversible SNN node memory(MiB)  | 75    | 76    | 79    | 76      | 76.25   | 78.5    | 76      | 78.75   | 77.75    | 79     |
| VGG13                            |       |       |       |         |         |         |         |         |          |        |
| Timesteps                        | 1     | 2     | 3     | 4       | 5       | 6       | 7       | 8       | 9        | 10     |
| Origina SNN node memory(MiB)     | 491   | 858   | 1220  | 1588.75 | 1952.75 | 2318.5  | 2684.25 | 3049.25 | 3416.375 | 3782.5 |
| Reversible SNN node memory(MiB)  | 122   | 121   | 120.5 | 123     | 122.75  | 122     | 124.25  | 121.75  | 123      | 122.5  |
| VGG16                            |       |       |       |         |         |         |         |         |          |        |
| Timesteps                        | 1     | 2     | 3     | 4       | 5       | 6       | 7       | 8       | 9        | 10     |
| Origina SNN node memory(MiB)     | 544   | 950   | 1355  | 1759    | 2166    | 2570    | 2976    | 3378    | 3786     | 4192   |
| Reversible SNN node memory(MiB)  | 134   | 132   | 135   | 135.5   | 134.5   | 141     | 140.5   | 140.5   | 138      | 140.75 |
| VGG19                            |       |       |       |         |         |         |         |         |          |        |
| Timesteps                        | 1     | 2     | 3     | 4       | 5       | 6       | 7       | 8       | 9        | 10     |
| Origina SNN node memory(MiB)     | 595.5 | 1042  | 1486  | 1930    | 2374    | 2819.75 | 3265    | 3708    | 4150     | 4595   |
| Reversible SNN node memory(MiB)  | 147   | 147   | 148   | 146.25  | 147.5   | 152     | 152.5   | 155     | 155.25   | 157.5  |

Table 3: Original memory data comparing reversible SNN nodes and original SNN nodes for VGG configurations from timestep 11 to 20.

| VGG architectures timesteps 11-20 |        |         |         |          |         |          |          |         |        |       |
|-----------------------------------|--------|---------|---------|----------|---------|----------|----------|---------|--------|-------|
| VGG11                             |        |         |         |          |         |          |          |         |        |       |
| Timesteps                         | 11     | 12      | 13      | 14       | 15      | 16       | 17       | 18      | 19     | 20    |
| Origina SNN node memory(MiB)      | 2519.5 | 2740.5  | 2964.5  | 3186.375 | 3407.25 | 3627.875 | 3852     | 4074.25 | 4296   | 4518  |
| Reversible SNN node memory(MiB)   | 77     | 77      | 80      | 78.375   | 75.25   | 76.375   | 78       | 77.75   | 78.75  | 77.5  |
| VGG13                             |        |         |         |          |         |          |          |         |        |       |
| Timesteps                         | 11     | 12      | 13      | 14       | 15      | 16       | 17       | 18      | 19     | 20    |
| Origina SNN node memory(MiB)      | 4148   | 4513.25 | 4878.5  | 5246.75  | 5612    | 5977.25  | 6344.375 | 6710.5  | 7076   | 7441  |
| Reversible SNN node memory(MiB)   | 121.5  | 121.25  | 123     | 122.75   | 121     | 123.75   | 121.5    | 124     | 123.25 | 122.5 |
| VGG16                             |        |         |         |          |         |          |          |         |        |       |
| Timesteps                         | 11     | 12      | 13      | 14       | 15      | 16       | 17       | 18      | 19     | 20    |
| Origina SNN node memory(MiB)      | 4596.5 | 5001.75 | 5404.75 | 5810.75  | 6213.75 | 6620.5   | 7025     | 7429    | 7832   | 8235  |
| Reversible SNN node memory(MiB)   | 139.5  | 138.75  | 140.25  | 140      | 139.5   | 139.5    | 138      | 139     | 137    | 138.5 |
| VGG19                             |        |         |         |          |         |          |          |         |        |       |
| Timesteps                         | 11     | 12      | 13      | 14       | 15      | 16       | 17       | 18      | 19     | 20    |
| Origina SNN node memory(MiB)      | 5039   | 5484    | 5929    | 6373     | 6816    | 7258     | 7701     | 8145.5  | 8588   | 9032  |
| Reversible SNN node memory(MiB)   | 155    | 156.25  | 154.75  | 158.5    | 158     | 158.25   | 157.5    | 156     | 152.5  | 154   |

Table 4: Original memory data comparing reversible SNN nodes and original SNN nodes for ResNet configurations from timesteps 1 to 10.

| ResNet architectures timesteps 1-10 |       |      |       |       |       |        |       |       |       |       |
|-------------------------------------|-------|------|-------|-------|-------|--------|-------|-------|-------|-------|
| ResNet19                            |       |      |       |       |       |        |       |       |       |       |
| Timesteps                           | 1     | 2    | 3     | 4     | 5     | 6      | 7     | 8     | 9     | 10    |
| Origina SNN node memory(MiB)        | 670.4 | 1378 | 1987  | 2597  | 3206  | 3812.4 | 4422  | 5031  | 5638  | 6247  |
| Reversible SNN node memory(MiB)     | 192   | 225  | 256   | 288   | 320   | 352    | 384   | 416   | 448   | 480   |
| ResNet34                            |       |      |       |       |       |        |       |       |       |       |
| Timesteps                           | 1     | 2    | 3     | 4     | 5     | 6      | 7     | 8     | 9     | 10    |
| Origina SNN node memory(MiB)        | 972.5 | 1722 | 2475  | 3228  | 3980  | 4733   | 5486  | 6238  | 6990  | 7741  |
| Reversible SNN node memory(MiB)     | 242   | 274  | 307   | 341   | 370   | 401    | 433   | 464   | 497   | 531   |
| ResNet50                            |       |      |       |       |       |        |       |       |       |       |
| Timesteps                           | 1     | 2    | 3     | 4     | 5     | 6      | 7     | 8     | 9     | 10    |
| Origina SNN node memory(MiB)        | 2971  | 5221 | 7470  | 9724  | 11978 | 14232  | 16481 | 18731 | 20989 | 23240 |
| Reversible SNN node memory(MiB)     | 740   | 774  | 803   | 836   | 873   | 902    | 934   | 965   | 996   | 1031  |
| ResNet101                           |       |      |       |       |       |        |       |       |       |       |
| Timesteps                           | 1     | 2    | 3     | 4     | 5     | 6      | 7     | 8     | 9     | 10    |
| Origina SNN node memory(MiB)        | 4662  | 8140 | 11608 | 15087 | 18558 | 22048  | 25513 | 28993 | 32465 | 35954 |
| Reversible SNN node memory(MiB)     | 1151  | 1186 | 1216  | 1248  | 1281  | 1314   | 1347  | 1382  | 1410  | 1440  |

## A.5 TRAINING TIME EVALUATION EXPERIMENT DATA

This section presents the detailed experimental data from Section 5.3. Backward training time data for three different methods from timesteps 1 to 10 is shown in Table 5, and forward training time data for three different methods is shown in Table 6. We only tested the forward time for timesteps 4, 6 and 8.

Table 5: Original training **backward** time data for VGG configurations from timesteps 1 to 10. (a): Original SNN node, (b): Reversible SNN node with original reversible backpropagation method, (c): Reversible SNN node with our backpropagation method. The Unit of each number: ms.

| VGG11     |       |       |        |        |        |        |        |        |        |        |
|-----------|-------|-------|--------|--------|--------|--------|--------|--------|--------|--------|
| Timesteps | 1     | 2     | 3      | 4      | 5      | 6      | 7      | 8      | 9      | 10     |
| (a)       | 12.68 | 18.13 | 31.08  | 39.78  | 49.92  | 59.64  | 71.36  | 74.59  | 87.58  | 100.17 |
| (b)       | 22.31 | 47.19 | 55.44  | 66.85  | 85.05  | 88.63  | 100.97 | 117.14 | 124.27 | 140.68 |
| (c)       | 19.11 | 32.85 | 39.92  | 57.79  | 64.95  | 73.95  | 85.21  | 93.00  | 113.74 | 124.48 |
| VGG13     |       |       |        |        |        |        |        |        |        |        |
| Timesteps | 1     | 2     | 3      | 4      | 5      | 6      | 7      | 8      | 9      | 10     |
| (a)       | 14.84 | 30.56 | 44.85  | 59.21  | 69.50  | 86.61  | 104.24 | 116.89 | 129.91 | 144.79 |
| (b)       | 32.78 | 55.57 | 80.78  | 98.06  | 120.30 | 142.69 | 164.87 | 184.96 | 206.38 | 225.35 |
| (c)       | 24.97 | 43.72 | 64.67  | 83.66  | 103.13 | 122.18 | 136.46 | 151.40 | 165.39 | 189.51 |
| VGG16     |       |       |        |        |        |        |        |        |        |        |
| Timesteps | 1     | 2     | 3      | 4      | 5      | 6      | 7      | 8      | 9      | 10     |
| (a)       | 16.49 | 34.30 | 53.25  | 66.46  | 81.57  | 101.78 | 118.29 | 138.28 | 150.98 | 178.04 |
| (b)       | 39.02 | 67.28 | 89.73  | 115.53 | 135.51 | 161.96 | 194.41 | 217.10 | 270.88 | 299.63 |
| (c)       | 28.64 | 55.77 | 71.43  | 98.41  | 117.80 | 132.22 | 157.41 | 176.71 | 204.49 | 241.00 |
| VGG19     |       |       |        |        |        |        |        |        |        |        |
| Timesteps | 1     | 2     | 3      | 4      | 5      | 6      | 7      | 8      | 9      | 10     |
| (a)       | 20.85 | 37.88 | 60.57  | 83.70  | 98.88  | 119.59 | 142.08 | 159.53 | 181.68 | 202.06 |
| (b)       | 47.00 | 75.84 | 105.98 | 144.35 | 176.03 | 192.37 | 236.23 | 284.01 | 298.23 | 325.66 |
| (c)       | 36.50 | 64.47 | 85.73  | 109.13 | 132.40 | 152.03 | 174.11 | 197.11 | 223.19 | 249.19 |

Table 6: Original training **forward** time data for VGG configurations from timesteps 4 to 8. (a): Original SNN node, (b): Reversible SNN node with original reversible backpropagation method, (c): Reversible SNN node with our backpropagation method. The Unit of each number: ms.

| VGG11     |       |       |       |
|-----------|-------|-------|-------|
| Timesteps | 4     | 6     | 8     |
| (a)       | 35.91 | 42.14 | 51.63 |
| (b)       | 34.00 | 41.19 | 53.44 |
| (c)       | 34.71 | 44.33 | 47.63 |
| VGG13     |       |       |       |
| Timesteps | 4     | 6     | 8     |
| (a)       | 36.06 | 42.39 | 56.93 |
| (b)       | 37.10 | 44.24 | 56.72 |
| (c)       | 35.16 | 47.55 | 54.71 |
| VGG16     |       |       |       |
| Timesteps | 4     | 6     | 8     |
| (a)       | 39.79 | 57.50 | 72.84 |
| (b)       | 40.84 | 60.11 | 75.66 |
| (c)       | 37.65 | 58.78 | 75.15 |
| VGG19     |       |       |       |
| Timesteps | 4     | 6     | 8     |
| (a)       | 41.83 | 69.32 | 80.33 |
| (b)       | 42.77 | 72.40 | 82.37 |
| (c)       | 39.50 | 67.30 | 80.13 |
